# Supplementary material
Source: PubMed Central journal article supplement (PMC4359953)
Supplement: NIHMS655420-supplement-2.pdf [file NIHMS655420-supplement-2.pdf]

# Supplemental Figure 1

**Table 1. Model variables, their range and descriptions.**

| Variables   | Range | Description              |
|-------------|-------|--------------------------|
| <i>ER</i>   | 0~1   | Active ER $\alpha$ level |
| <i>IRF1</i> | 0~1   | Active IRF1 level        |
| <i>ATG7</i> | 0~1   | Active ATG7 level        |
| <i>PI</i>   | 0~1   | Proliferation index      |

$$\frac{dER}{dt} = \gamma_{ER} \cdot (H(W_{ER}) - ER) \quad (S1)$$

$$\frac{dIRF1}{dt} = \gamma_{IRF1} \cdot (H(W_{IRF1}) - IRF1) \quad (S2)$$

$$\frac{dATG7}{dt} = \gamma_{ATG7} \cdot (H(W_{ATG7}) - ATG7) \quad (S3)$$

$$\frac{dPI}{dt} = \gamma_{PI} \cdot (H(W_{PI}) - PI) \quad (S4)$$

$$H(W) = \frac{1}{1+e^{-W}} \quad (S5)$$

$$W_{ER} = \omega_{ER} + \omega_{ER,ICI} \cdot \frac{ICI}{K_{mICI} + ICI} + \omega_{ER,ATG7} \cdot ATG7 \quad (S6)$$

$$W_{IRF1} = \omega_{IRF1} + \omega_{IRF1,ER} \cdot ER + \omega_{IRF1,siIRF1} \cdot siIRF1 \quad (S7)$$

$$W_{ATG7} = \omega_{ATG7} + \omega_{ATG7,IRF1} \cdot IRF1 + \omega_{ATG7,siATG7} \cdot siATG7 \quad (S8)$$

$$W_{PI} = \omega_{PI} + \omega_{PI,IRF1} \cdot IRF1 + \omega_{PI,ATG7} \cdot ATG7 + \omega_{PI,ER} \cdot ER \quad (S9)$$
