# Supplementary material
Source: PubMed Central journal article supplement (PMC4359953)
Supplement: NIHMS655420-supplement-8.pdf [file NIHMS655420-supplement-8.pdf]

## Supplemental Table 1

| <b>Characteristics</b> | n      | %   |
|------------------------|--------|-----|
| <b>Diagnosis</b>       |        |     |
| Normal                 | 12/107 | 11% |
| DCIS                   | 12/107 | 11% |
| Invasive               | 83/107 | 78% |
| <b>Biomarker</b>       |        |     |
| ER+                    | 31/52  | 60% |
| PR+                    | 27/52  | 52% |
| HER2+                  | 42/52  | 81% |
| <b>Tumor size</b>      |        |     |
| <2 cm                  | 38/68  | 56% |
| ≥2 cm                  | 30/68  | 44% |
| <b>Mutation status</b> |        |     |
| Full negative          | 56/91  | 62% |
| BRCA1 mutation         | 21/91  | 23% |
| BRCA2 mutation         | 14/91  | 15% |
