# Supplementary material
Source: PubMed Central journal article supplement (PMC4359953)
Supplement: NIHMS655420-supplement-9.pdf [file NIHMS655420-supplement-9.pdf]

## Supplemental Table 2

ER status

|                    | Negative    | Positive    |
|--------------------|-------------|-------------|
| IRF1-nuc positive  | 13/35 (37%) | 1/48 (2%)   |
| IRF1-cyto positive | 26/35 (74%) | 34/48 (71%) |
| ATG7 positive      | 3/28 (11%)  | 1/38 (3%)   |
