# Supplementary material
Source: PubMed Central journal article supplement (PMC4359953)

# Supplemental Figure 3

**A**

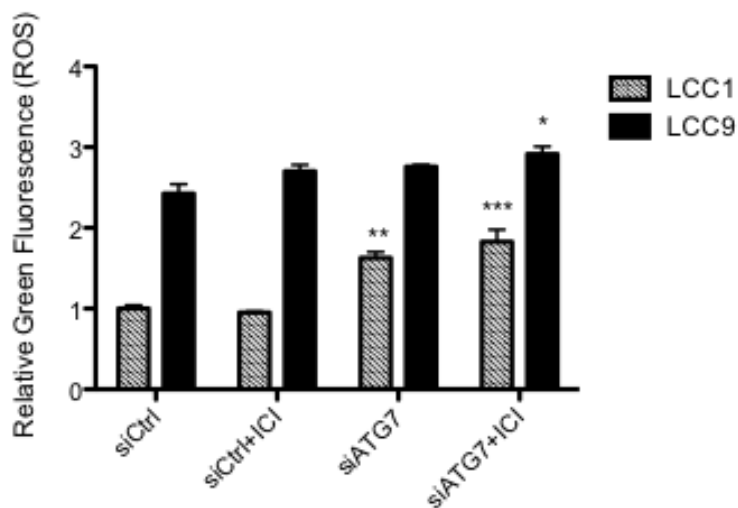

**B**

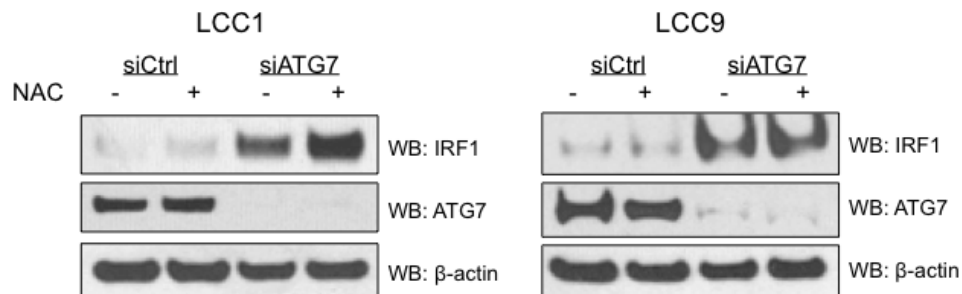

Supplement: NIHMS655420-supplement-4.pdf [file NIHMS655420-supplement-4.pdf]

# Supplementary Figure 4

**A**

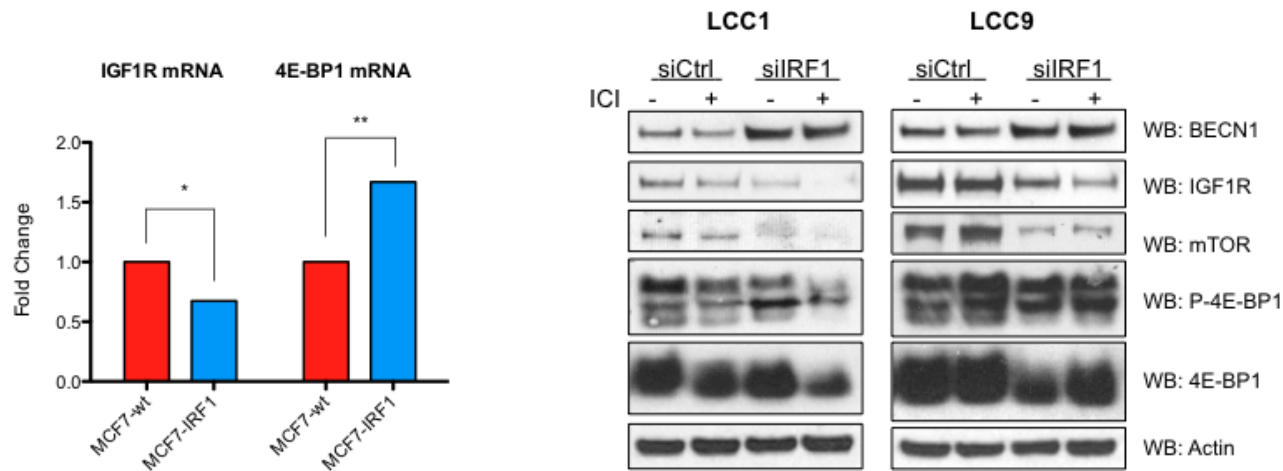

**C**

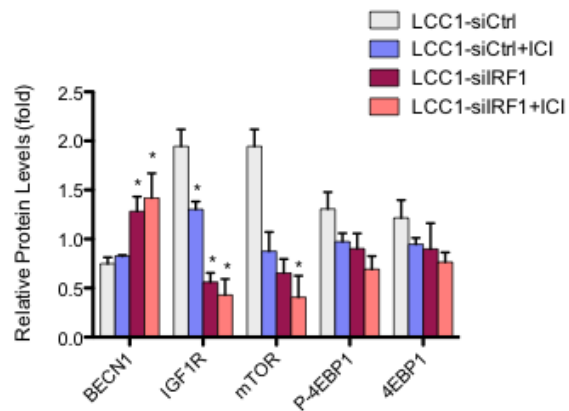

**D**

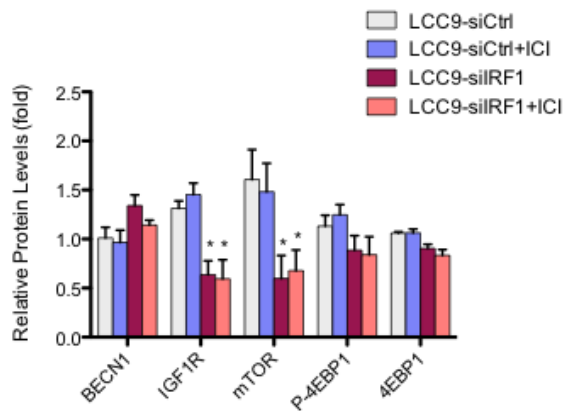

Supplement: NIHMS655420-supplement-5.pdf [file NIHMS655420-supplement-5.pdf]

# Supplemental Figure 5

**A**

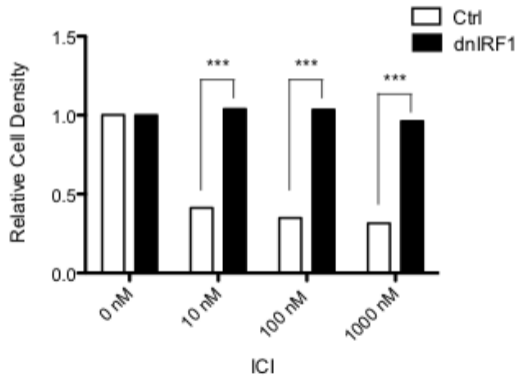

**B**

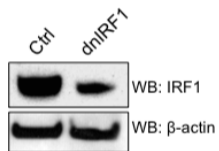

Supplement: NIHMS655420-supplement-6.pdf [file NIHMS655420-supplement-6.pdf]

# Supplemental Figure 6

**A**

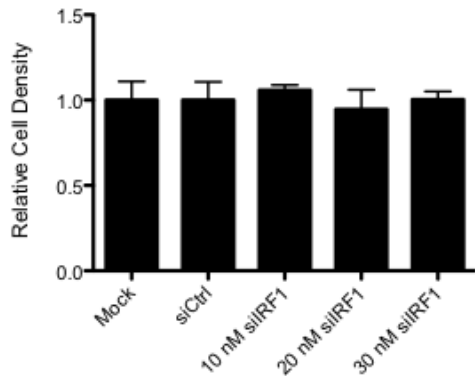

**B**

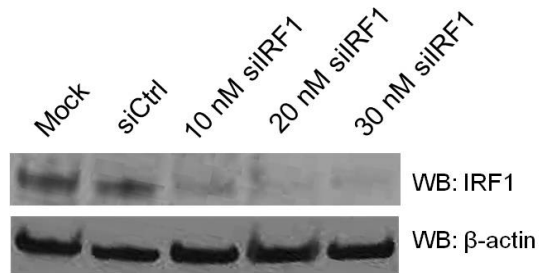

Supplement: NIHMS655420-supplement-7.pdf [file NIHMS655420-supplement-7.pdf]
